# Supplementary material for: The macronutrient and micronutrient (iron and manganese) signature of icebergs
Source: Copernicus journal article supplement (doi:10.5194/egusphere-2023-2991), 2024-01-09
Supplement: Supplementary file 1 [file egusphere-2023-2991-supplement.zip]

## Supplementary Material

| Element | Measured | Consensus Wuttig et al., (2019) nmol kg <sup>-1</sup> | Consensus (GEOTRACES) nmol kg <sup>-1</sup> |
|---------|----------|-------------------------------------------------------|---------------------------------------------|
| Ni (nM) | 2.53     | 2.44                                                  | 2.595                                       |
| Cu (nM) | 0.65     | 0.58                                                  | 0.574                                       |
| Co (pM) | 4.3      | 7                                                     | n/a                                         |

Supplementary Table 1. Analysis of reference material GSP for trace elements via pre-concentration using a seaFAST system. GEOTRACES values (<https://www.geotraces.org/standards-and-reference-materials>) last accessed October 2023.

5

| Runoff Location                                                                    | dSi / $\mu\text{M}$ | NO <sub>x</sub> / $\mu\text{M}$ | PO <sub>4</sub> / $\mu\text{M}$ |
|------------------------------------------------------------------------------------|---------------------|---------------------------------|---------------------------------|
| Beagle Channel (close to Pia fjord), n=2                                           | 38.79               | 3.57                            | 0.29                            |
| Beagle Channel Yendegaia fjord, n=3                                                | 44.34               | 2.82                            | 0.34                            |
| Saqqarleq Fjord–Saqqarliup Sermia (close to Jakobshavn Isbræ, west Greenland), n=2 | 18.83               | 0.65                            | 0.17                            |
| Doumer Island (close to South Bay, Western Antarctic Peninsula)                    | 1.20                | 0.17                            | 0.02                            |
| Kongsfjorden (Svalbard)                                                            | 4.12                | 2.50                            | 0.12                            |
| Saqqap Sermersua (Nuup Kangerlua, southwest Greenland)                             | 33                  | 2.50                            | 0.30                            |

Supplementary Table 2. Runoff concentrations corresponding to iceberg collection sites. Doumer Island data from Krause et al., (2021). Kongsfjorden data from Cantoni et al., (2020). Nuup Kangerlua data from Meire et al., (2016).

| Zone     | Ice origin                | NO <sub>x</sub> ( $\mu\text{M}$ ) | PO <sub>4</sub> ( $\mu\text{M}$ ) | dSi ( $\mu\text{M}$ )  |
|----------|---------------------------|-----------------------------------|-----------------------------------|------------------------|
| Coastal  | Equip Sermia (n=43)       | 0.61 $\pm$ 0.50 (0.57)            | 0.04 $\pm$ 0.01 (0.03)            | 0.15 $\pm$ 0.56 (0.03) |
|          | Ilulissat Icefjord (n=14) | 1.09 $\pm$ 0.43 (1.14)            | 0.09 $\pm$ 0.07 (0.09)            | 0.05 $\pm$ 0.03 (0.04) |
| Offshore | Iceberg ‘Beluga’ (n=12)   | 0.97 $\pm$ 0.41 (1.03)            | 0.09 $\pm$ 0.06 (0.07)            | 0.16 $\pm$ 0.38 (0.05) |
|          | Iceberg ‘Narwhal’ (n=18)  | 1.16 $\pm$ 0.31 (1.10)            | 0.01 $\pm$ 0.01 (0.01)            | 0.01 $\pm$ 0.04 (0.00) |

10 Supplementary Table 3. Nutrient concentrations in ice from four distinct zones within Disko Bay. Zones as per Fig. 3. Summarized as mean  $\pm$  standard deviation (median), ‘n’ number of samples.

| (Micro)Nutrient      | May 2014<br>(n=13)            | July 2015<br>(n=21)            | August 2018<br>(n=9)        | May 2019<br>(n=18)      | September<br>2019 (n=22) |
|----------------------|-------------------------------|--------------------------------|-----------------------------|-------------------------|--------------------------|
| dFe / nM             | 37.86 ±<br>88.94<br>(12.15)   | n/d                            | 12.65 ± 9.68<br>(17.14)     | 10.82 ±<br>11.27 (5.32) | 6.57 ± 2.58<br>(6.08)    |
| TdFe / nM            | 306.78 ±<br>491.61<br>(94.82) | 520.04 ±<br>1127.44<br>(27.54) | 47.69 ±<br>60.33<br>(27.96) | n/d                     | 32.48 ±<br>36.22 (20.30) |
| dMn / nM             | n/d                           | n/d                            | 0.87 ± 0.70<br>(0.67)       | 0.82 ± 0.66<br>(0.71)   | n/d                      |
| TdMn / nM            | n/d                           | n/d                            | 1.52 ± 1.25<br>(1.06)       | n/d                     | 1.14 ± 0.65<br>(0.95)    |
| PO <sub>4</sub> / μM | 0.03 ± 0.04<br>(0.02)         | 0.04 ± 0.02<br>(0.04)          | 0.05 ± 0.10<br>(0.00)       | 0.02 ± 0.06<br>0.00     | All b/d                  |
| NO <sub>x</sub> / μM | 1.96 ± 1.68<br>(1.59)         | 1.79 ± 0.97<br>(1.77)          | 0.79 ± 0.51<br>(0.69)       | 0.49 ± 0.63<br>(0.27)   | 0.62 ± 0.40<br>(0.64)    |
| dSi / μM             | All b/d                       | 0.25 ± 0.22<br>(0.19)          | 0.61 ± 0.73<br>(0.32)       | 0.22 ± 0.54<br>(0.09)   | 0.57 ± 0.45<br>(0.64)    |

15 Supplementary Table 4. (Micro)nutrient concentrations in ice from repeat sampling of ice in Nuup Kangerlua (southwest Greenland), otherwise known as Godthåbsfjorden. Concentrations summarized as mean ± standard deviation (median), ‘n’ is the number of nutrient samples. ‘n/d’ represents no data, ‘All b/d’ means samples were all below the detection limit. 2014 data from Hopwood et al., (2016). 2015 Fe data from Hopwood et al., (2019).

20

| Trace metal | Icebergs<br>(herein) | Transpolar Drift<br>(European Arctic)<br>(meteoric water regression) | Northeast Greenland shelf<br>(salinity regression) | Leverett Glacier<br>(west Greenland) runoff | West and southwest Greenland<br>(salinity regression) | Doumer Island<br>(Antarctic Peninsula) runoff |
|-------------|----------------------|----------------------------------------------------------------------|----------------------------------------------------|---------------------------------------------|-------------------------------------------------------|-----------------------------------------------|
| Co (nM)     | 0.021                | 0.854                                                                | 1.54                                               | 1.53                                        | 2.7                                                   | 0.16                                          |
| Ni (nM)     | 0.36                 | 31                                                                   | 22.6                                               | 12.5                                        | 11                                                    | 0.30                                          |
| Cu (nM)     | 0.39                 | 30                                                                   | 29.2                                               | 10.5                                        | 7.4                                                   | 2.64                                          |

25 Supplementary Table 5. Concentrations of dissolved trace elements in icebergs and other freshwater sources. A linear regression to 100% meteoric water for the Transpolar Drift was derived by Charette et al., (2020). A regression to zero salinity for the northeast Greenland shelf was derived by Chen et al., (2022). Similar regressions for west Greenland and runoff concentrations from Doumer Island are provided by Krause et al., (2021). Volume-weighted mean runoff concentrations for Leverett Glacier are provided by Hawkings et al., (2020).

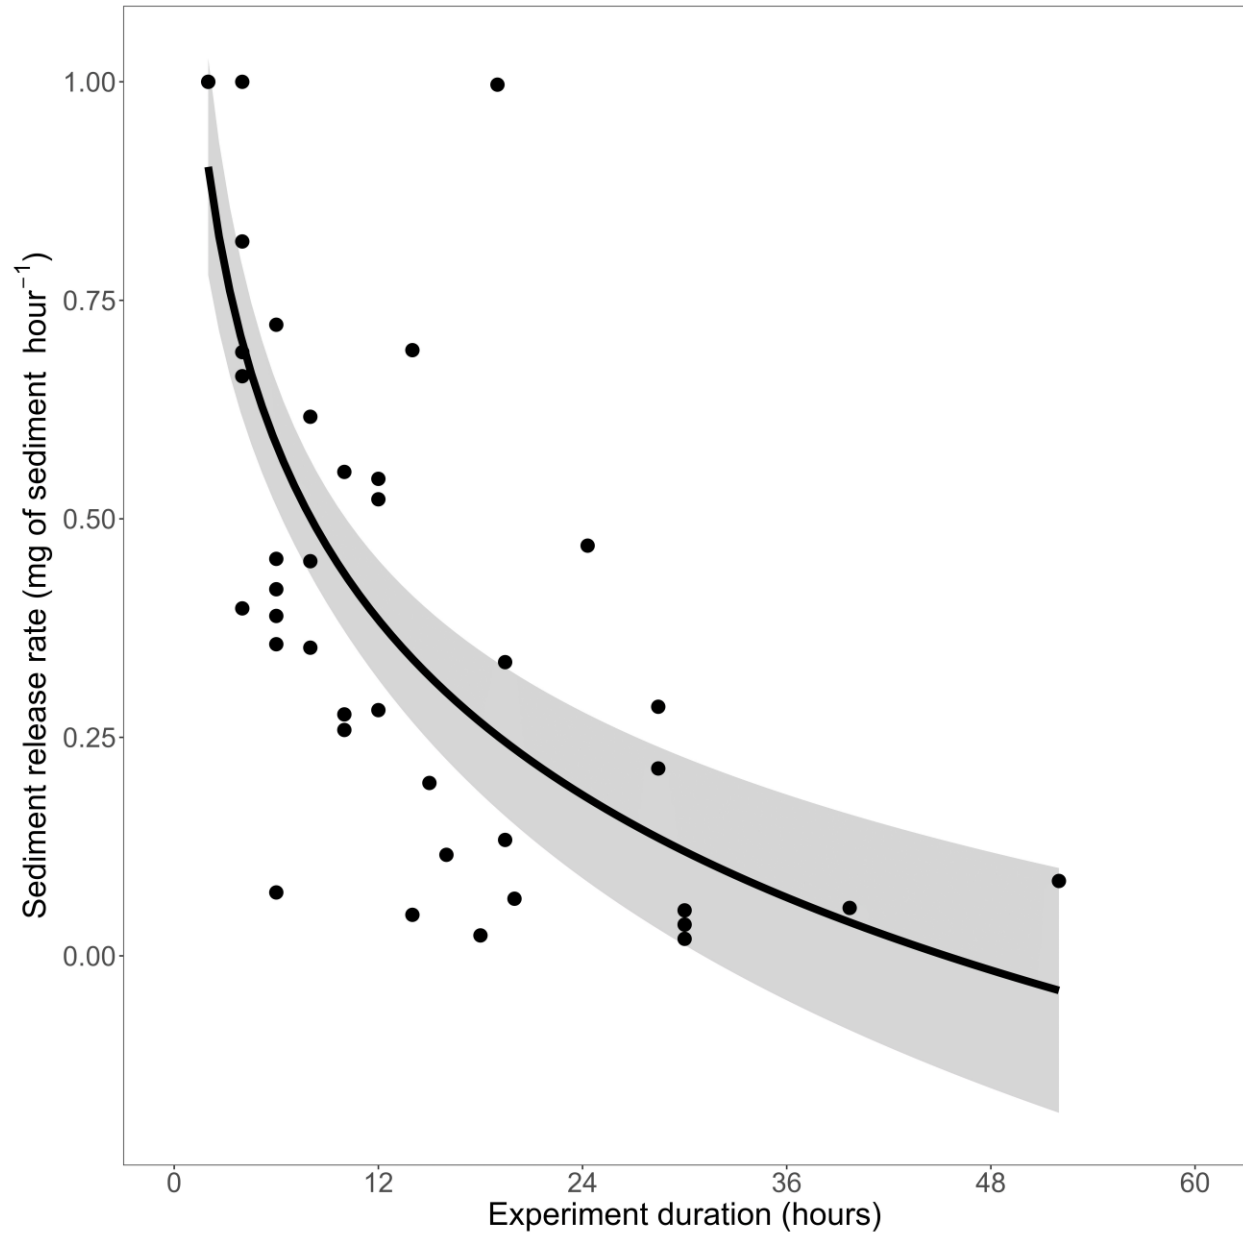

Supplementary Figure 1. Sediment released from large (10-45 kg) fragments of ice collected in Maxwell Bay which were specifically targeted as pieces with visible embedded sediment layers and no surface sediment. Ice fragments were boxed in opaque containers and allowed to melt at an ambient temperature of 5-10°C. Total volume loss over 48 hours was ~20% of ice volume.

30

## Supplementary References

- Cantoni, C., Hopwood, M. J., Clarke, J. S., Chiggiato, J., Achterberg, E. P., & Cozzi, S. (2020). Glacial drivers of marine biogeochemistry indicate a future shift to more corrosive conditions in an Arctic fjord. *Journal of Geophysical Research: Biogeosciences*, 125, e2020JG005633.  
40 <https://doi.org/10.1029/2020JG005633>
- Charette, M. A., Kipp, L. E., Jensen, L. T., Dabrowski, J. S., Whitmore, L. M., Fitzsimmons, J. N., Williford, T., Ulfso, A., Jones, E., Bundy, R. M., Vivancos, S. M., Pahnke, K., John, S. G., Xiang, Y., Hatta, M., Petrova, M. V., Heimbürger-Boavida, L.-E., Bauch, D., Newton, R., ... Zhang, R. (2020). The  
45 Transpolar Drift as a Source of Riverine and Shelf-Derived Trace Elements to the Central Arctic Ocean. *Journal of Geophysical Research: Oceans*, 125(5), e2019JC015920.  
<https://doi.org/10.1029/2019JC015920>
- Chen, X.-G., Krisch, S., Al-Hashem, A., Hopwood, M. J., Rutgers van der Loeff, M. M., Huhn, O., Lodeiro, P., Steffens, T., & Achterberg, E. P. (2022). Dissolved, Labile, and Total Particulate Trace Metal  
50 Dynamics on the Northeast Greenland Shelf. *Global Biogeochemical Cycles*, 36(12), e2022GB007528. <https://doi.org/10.1029/2022GB007528>
- Hawkings, J. R., Skidmore, M. L., Wadham, J. L., Priscu, J. C., Morton, P. L., Hatton, J. E., Gardner, C. B., Kohler, T. J., Stibal, M., Bagshaw, E. A., Steigmeyer, A., Barker, J., Dore, J. E., Lyons, W. B., Tranter, M., & Spencer, R. G. M. (2020). Enhanced trace element mobilization by Earth's ice sheets.  
55 *Proceedings of the National Academy of Sciences*, 117(50), 31648–31659.  
<https://doi.org/10.1073/pnas.2014378117>
- Hopwood, M. J., Carroll, D., Höfer, J., Achterberg, E. P., Meire, L., Le Moigne, F. A. C., Bach, L. T., Eich, C., Sutherland, D. A., & González, H. E. (2019). Highly variable iron content modulates iceberg-ocean  
fertilisation and potential carbon export. *Nature Communications*, 10(1), 5261.  
<https://doi.org/10.1038/s41467-019-13231-0>
- 60 Hopwood, M. J., Connelly, D. P., Arendt, K. E., Juul-Pedersen, T., Stinchcombe, M. C., Meire, L., Esposito, M., & Krishna, R. (2016). Seasonal changes in Fe along a glaciated Greenlandic fjord. *Frontiers in Earth Science*, 4. <https://doi.org/10.3389/feart.2016.00015>
- Krause, J., Hopwood, M. J., Höfer, J., Krisch, S., Achterberg, E. P., Alarcón, E., Carroll, D., González, H. E., Juul-Pedersen, T., Liu, T., Lodeiro, P., Meire, L., & Rosing, M. T. (2021). Trace Element (Fe, Co, Ni  
65 and Cu) Dynamics Across the Salinity Gradient in Arctic and Antarctic Glacier Fjords. *Frontiers in Earth Science*, 9, 878. <https://doi.org/10.3389/feart.2021.725279>
- Meire, L., Meire, P., Struyf, E., Krawczyk, D. W., Arendt, K. E., Yde, J. C., Juul Pedersen, T., Hopwood, M. J., Rysgaard, S., & Meysman, F. J. R. (2016). High export of dissolved silica from the Greenland Ice Sheet. *Geophysical Research Letters*, 43(17). <https://doi.org/10.1002/2016GL070191>
- 70 Wuttig, K., Townsend, A. T., van der Merwe, P., Gault-Ringold, M., Holmes, T., Schallenberg, C., Latour, P., Tonnard, M., Rijkenberg, M. J. A., Lannuzel, D., & Bowie, A. R. (2019). Critical evaluation of a seaFAST system for the analysis of trace metals in marine samples. *Talanta*, 197, 653–668.  
<https://doi.org/10.1016/j.talanta.2019.01.047>
